# Supplementary material for: A Further Look at Porcine Chromosome 7 Reveals VRTN Variants Associated with Vertebral Number in Chinese and Western Pigs
Source: PLoS One. 2013 Apr 24;8(4):e62534. doi: 10.1371/journal.pone.0062534 (PMC3634791; doi:10.1371/journal.pone.0062534)
Supplement: Table S2 — The effect of the most significant SNPs on the number of thoracic vertebrae in three experimental populations. (DOC) [file pone.0062534.s005.doc]

**Table S2 The effect of the most significant SNPs on the number of thoracic vertebrae in three experimental populations a.**

| Population | Genotype (no. of individuals) | | | Log(1/P*)* | *F-*value |
| --- | --- | --- | --- | --- | --- |
| 11 | 12 | 22 |
| White Duroc × Erhualian F2 intercross | 15.48 ± 0.03 a (341) | 14.91 ± 0.04 b (446) | 14.17 ± 0.05 c (129) | 34.11 | 357.70 |
| Sutai pigs | 15.04 ± 0.09 a (26) | 14.40 ± 0.10 b (171) | 13.87 ± 0.09 c (211) | 21.25 | 115.40 |
| Tongcheng × Erhualian F2 intercross | 14.83 ± 0.09 a (12) | 14.66 ± 0.13 b (12) | 14.00 ± 0.11 c (20) | 4.90 | 29.82 |

a Phenotypic values are shown in mean ± standard deviation. Values with different superscripts in the same line are significantly different.
